# Supplementary material
Source: PubMed Central journal article supplement (PMC3402552)

# Supporting Information

For

## Life Beyond Kinases: Structure-based Discovery of Sorafenib as Nanomolar Antagonist of 5-HT Receptors

*Xingyu Lin<sup>1,2</sup>, Xi-Ping Huang<sup>3</sup>, Gang Chen<sup>4</sup>, Ryan Whaley<sup>3</sup>, Shiming Peng<sup>1</sup>, Yanli Wang<sup>1</sup>, Guoliang Zhang<sup>4</sup>, Simon X. Wang<sup>5</sup>, Shaohui Wang<sup>4</sup>, Bryan L. Roth<sup>3</sup> and Niu Huang<sup>1\*</sup>*

<sup>1</sup> National Institute of Biological Sciences, Beijing, No. 7 Science Park Road, Zhongguancun Life Science Park, Beijing 102206, China

<sup>2</sup> College of Life Sciences, Beijing Normal University, No. 19 Xijiekouwai St, Beijing 100875, China

<sup>3</sup> Department of Pharmacology and Division of Medicinal Chemistry and Natural Products, The University of North Carolina, Chapel Hill, North Carolina 27759, USA

<sup>4</sup> BeiGene (Beijing) Co., Ltd., No. 30 Science Park Road, Zhongguancun Life Science Park, Beijing 102206, China

<sup>5</sup> Department of Pharmaceutical Sciences, Howard University, Washington DC, 20059, USA

Corresponding Author

\* N. H. Phone: 86-10-80720645. Fax : 86-10-80720813. Email : [huangniu@nibs.ac.cn](mailto:huangniu@nibs.ac.cn)

## Table of contents

|                                                                   |     |
|-------------------------------------------------------------------|-----|
| Sequence alignment between 5-HT <sub>2A</sub> and $\beta$ -2 AR   | S3  |
| <sup>1</sup> H-NMR spectrum and MS data of sorafenib              | S4  |
| The structural descriptors to assess the simulation quality       | S5  |
| Docking pose assessment                                           | S6  |
| The annotation of top scored molecules from docking and rescoring | S10 |
| Six FDA approved drugs selected for experimental binding assay    | S14 |
| Detailed binding and functional assays                            | S15 |
| Sorafenib analogues chemical synthesis route and analysis data    | S17 |

```

#MEGA
!Title beta-2 and 5-HT2A;
!Format
  DataType=Protein
  NSeqs=2 NSites=284
  Identical=. Missing=? Indel=-;

!Domain=Data;
#Beta-2_adrenoceptor DEVWVVGMI VMSLIVLAIV FGNVLVITAI AKFERLQTVT
#5HT2A                HLOEKNWSAL LTAVVIILTI A..I...M.V SLEKK..NA.

#Beta-2_adrenoceptor NYFITSLACA DLVMGLAVVP FGA AHILM-K MWTFGNFWCE
#5HT2A                ...LM...I. .MLL.FL.M. VSMLT..YGY R.PLPSKL.A

#Beta-2_adrenoceptor FWTSIDVLCV TASIETLCVI AVDRYFAITS PFKYQSL LTK
#5HT2A                V.IYL...FS ....MH..A. SL...V...QN .IHHSRFNSR

#Beta-2_adrenoceptor NKARVIILMV WIVSGLTSFL PIQM-----
#5HT2A                T..FLK.IA. .TI.VGI.MP IPVFGLQDDS KVFKEGSCLL

#Beta-2_adrenoceptor --QAYAIASS IVSFYVPLVI MVFVYSRVFQ EAKRQ-----
#5HT2A                ADDNFVLIG. F...FI..T. ..IT.FLTIK SLOKEATLCV

#Beta-2_adrenoceptor ----KEHKAL KTLGIIMGTF TLCWLPFFIV NIVHVIQDN-
#5HT2A                QSISN.Q..C .V...VFFL. VVM.C....T ..MA..CKES

#Beta-2_adrenoceptor ---LIRKEVY ILLNWIGYVN SGFNPLIYC- RSPDFRIA FQ
#5HT2A                CNEDVIGALL NVFV....LS .AV...V.TL FNKTY.S..S

#Beta-2_adrenoceptor ELLC
#5HT2A                RYIQ

```

**Figure S1.** Sequence alignment between 5-HT<sub>2A</sub> and β-2 adrenoceptor in MEGA format (only shown residues used in structure modeling).

## A. <sup>1</sup>H-NMR

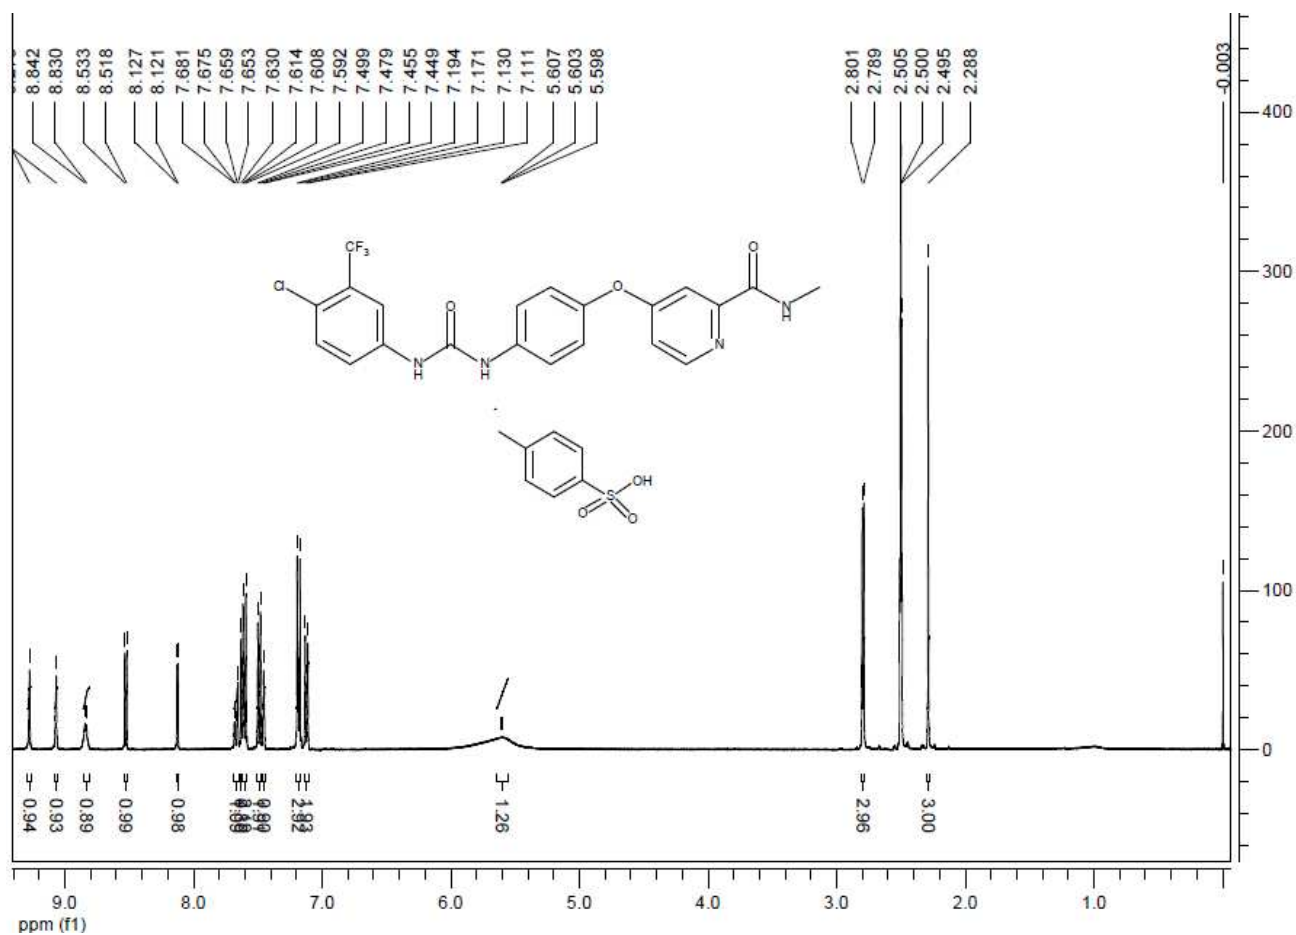

## B. MS

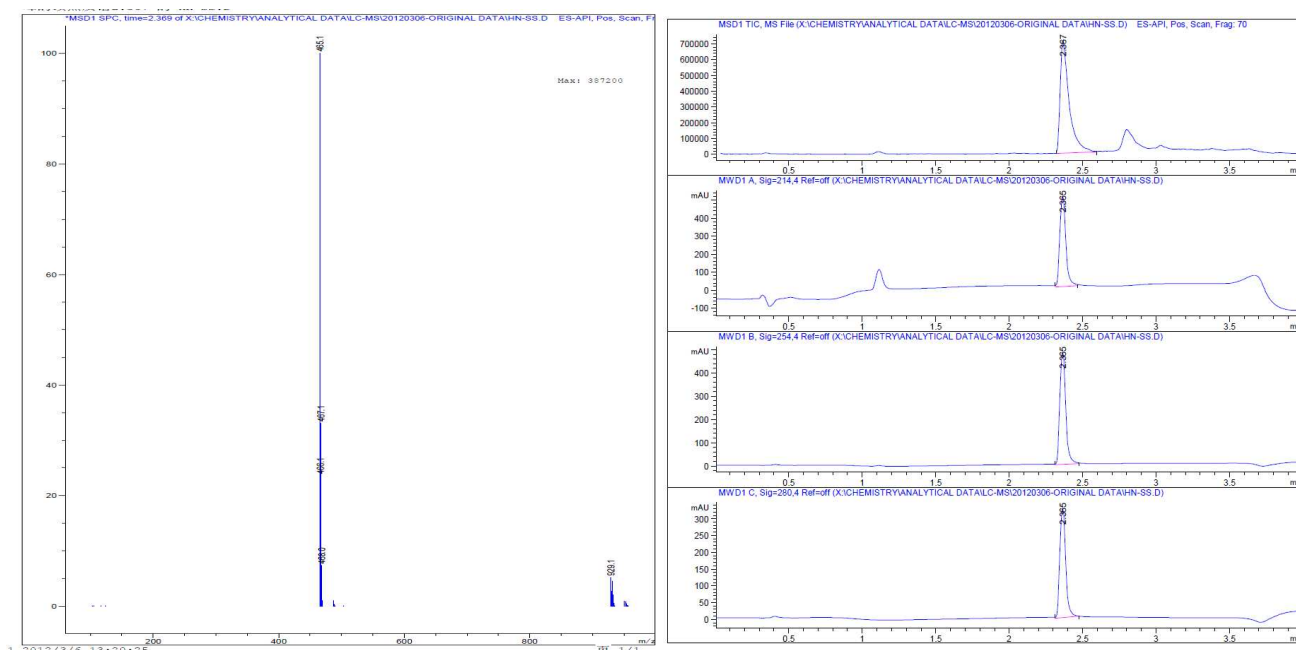

Figure S2. <sup>1</sup>H-NMR spectrum and MS data of sorafenib.

**Table S1.** The structural descriptors used to assess the simulation quality of Ketanserin complex system.

Only simulation 6 (Ket-6) satisfies all the experimental observation.

| Ketanserin Simulation systems | D3.32-ligand salt bridge | S3.36-ligand H-bond | Ratio of F6.52-ligand contacts | Ratio of W6.48-ligand contacts | R3.50-E6.30 ionic lock | D3.32-Y7.43 H-bond |
|-------------------------------|--------------------------|---------------------|--------------------------------|--------------------------------|------------------------|--------------------|
| 1                             | ✓                        | ✓                   | ✓                              | ×                              | ✓                      | ×                  |
| 2                             | ✓                        | ×                   | ✓                              | ×                              | ×                      | ✓                  |
| 3                             | ×                        | ×                   | ✓                              | ✓                              | ×                      | ×                  |
| 4                             | ✓                        | ✓                   | ✓                              | ✓                              | ×                      | ×                  |
| 5                             | ✓                        | ✓                   | ✓                              | ✓                              | ×                      | ×                  |
| 6                             | ✓                        | ✓                   | ✓                              | ✓                              | ✓                      | ✓                  |
| 7                             | ✓                        | ×                   | ✓                              | ✓                              | ×                      | ✓                  |
| 8                             | ✓                        | ✓                   | ✓                              | ×                              | ×                      | ✓                  |
| 9                             | ✓                        | ✓                   | ✓                              | ✓                              | ×                      | ×                  |
| 10                            | ✓                        | ×                   | ✓                              | ✓                              | ✓                      | ✓                  |
| 11                            | ✓                        | ✓                   | ✓                              | ×                              | ×                      | ✓                  |
| 12                            | ✓                        | ×                   | ✓                              | ✓                              | ✓                      | ✓                  |

Note: The formation of D3.32-ligand salt bridge interaction is defined as the distance between carboxylate oxygen atom of D3.32 and the piperidine nitrogen atom of ligand less than 3.5 Å, the ratio of this interaction is defined to be larger than 70%; the hydrogen bond between ligand and hydroxyl of residue S<sub>3,36</sub> is defined by the distance of donor and acceptor less than 3.5 Å and angle greater than 120° (same for D3.32-Y7.43 hydrogen bond), the ratio is defined as less than 30%; the ratio of F6.52-ligand contacts is defined by the number of atom pairs within vdW contact distance between ligand and F6.52 divided by the number of atom pairs between ligand and F6.51 (same for W6.48-ligand contacts), the ratio is defined as less than 50%; and the R3.50-E6.30 ionic lock is defined by distance less than 4 Å between CZ atom of R3.50 and CD atom of E6.30, the ratio is defined to be larger than 70%.

**Table S2.** Docking pose assessment for ketanserin-like and cyproheptadine-like ligands.

## a) 12 Clozapine-like ligands

| Zinc_ID   | Compound Name    | Chemical Structure                                                                  | Docking pose from initial homology model | Docking pose from Cyp-4-4 model |
|-----------|------------------|-------------------------------------------------------------------------------------|------------------------------------------|---------------------------------|
| C31261349 | Chlorprothixene  | 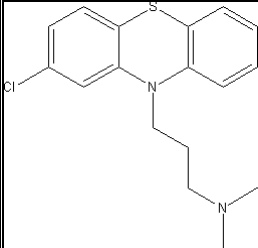   | No                                       | Yes                             |
| C22446674 | Thiethylperazine |    | Yes                                      | No                              |
| C19632674 | Olanzapin        |   | No                                       | Yes                             |
| C19362650 | Methiothepin     |  | No                                       | Yes                             |
| C00896849 | Propiomazine     |  | Yes                                      | Yes                             |
| C00056647 | Promethazine     |  | Yes                                      | Yes                             |

|                                  |                |                                                                                     |     |     |
|----------------------------------|----------------|-------------------------------------------------------------------------------------|-----|-----|
| C00044027                        | Chlorpromazine | 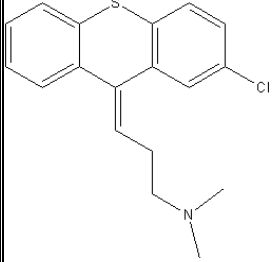   | Yes | Yes |
| C00020248                        | Clomipramine   |    | No  | Yes |
| C00010402                        | Promazine      |    | Yes | Yes |
| C00002264                        | Zotepine       |   | No  | Yes |
| C19203912                        | Fuphenazine    |  | No  | Yes |
| Ratio of correct pose prediction |                |                                                                                     | 45% | 91% |

b) 11 Ketanserin-like ligands

| Zinc_ID | Compound Name | Chemical Structure | Initial Homology Model | Ket-6-7 model |
|---------|---------------|--------------------|------------------------|---------------|
|         |               |                    |                        |               |

|           |             |                                                                                      |     |     |
|-----------|-------------|--------------------------------------------------------------------------------------|-----|-----|
| C19796084 | Pimozide    | 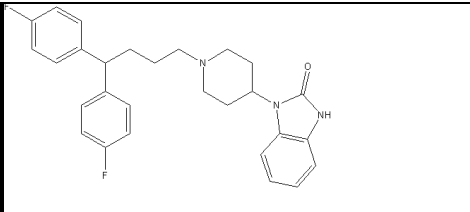    | No  | Yes |
| C00643233 | Spiperone   |    | No  | Yes |
| C00601304 | Prozasine   |    | No  | No  |
| C00538483 | Trazodone   |    | Yes | Yes |
| C00538314 | Ritanserin  |   | No  | No  |
| C00538312 | Risperidone |  | Yes | Yes |
| C00538184 | Pipamperone |  | No  | Yes |
| C00537877 | Ketanserin  |  | Yes | Yes |



|                                  |             |                                                                                    |     |     |
|----------------------------------|-------------|------------------------------------------------------------------------------------|-----|-----|
| C00537822                        | Haloperidol | 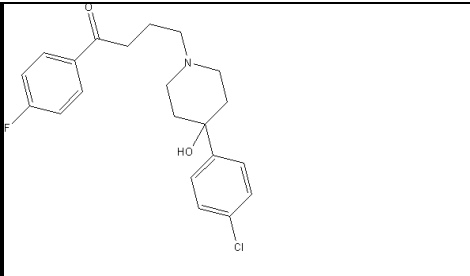  | Yes | Yes |
| C00056646                        | Pindolol    |  | No  | Yes |
| C00006788                        | I-741626    |  | No  | No  |
| Ratio of correct pose prediction |             |                                                                                    | 36% | 73% |

**Table S3.** The annotation of top scored molecules from docking and rescoring.

| ZINC ID  | annotated activity                  | reference     | Rescore-Rank | Testing status |
|----------|-------------------------------------|---------------|--------------|----------------|
| 20251    | Alpha-2A adrenergic receptor        | DrugBank      | 10           | neglect        |
| 3831042  | 5-hydroxytryptamine 2A receptor     | DrugBank      | 14           | neglect        |
| 3830583  |                                     |               | 18           | PDSP17675      |
| 3831041  | 5-hydroxytryptamine 2A receptor     | DrugBank      | 21           | neglect        |
| 58791    |                                     |               | 22           | PDSP17678      |
| 12503070 | Alpha-2A adrenergic receptor        | DrugBank      | 25           | neglect        |
| 6157     | Histamine H1 receptor               | ChEMBL        | 27           | neglect        |
| 18115268 | Histamine H1 receptor               | ChEMBL        | 29           | neglect        |
| 44027    | 5-hydroxytryptamine 2A receptor     | DrugBank      | 34           | neglect        |
| 3831172  |                                     |               | 35           | not available  |
| 1968     | likely be 5-HT <sub>2A</sub> binder |               | 36           | not available  |
| 2510048  | Histamine H1 receptor               | Sigma-Aldrich | 42           | neglect        |
| 1999487  | Histamine H2 receptor               | DrugBank      | 43           | neglect        |
| 968337   | Histamine H1 receptor               | DrugBank      | 44           | neglect        |
| 549      | Dopamine uptake inhibitor           | Sigma-Aldrich | 47           | neglect        |
| 57321    | Beta-2 adrenergic receptor          | DrugBank      | 48           | neglect        |
| 57204    | Histamine H1 receptor               | ChEMBL        | 50           | neglect        |
| 538564   | Androgen receptor                   | DrugBank      | 52           | PDSP17680      |
| 3830866  | likely be 5-HT <sub>2A</sub> binder |               | 53           | not available  |
| 1481714  | Histamine H1 receptor               | DrugBank      | 54           | neglect        |
| 3831578  |                                     |               | 55           | not available  |
| 416      | Alpha-1A adrenergic receptor        | DrugBank      | 56           | neglect        |
| 57435    | Alpha-2A adrenergic receptor        | DrugBank      | 58           | neglect        |

|          |                                         |          |     |               |
|----------|-----------------------------------------|----------|-----|---------------|
| 5626     | Alpha-2A adrenergic receptor            | DrugBank | 59  | neglect       |
| 3831238  | Alpha-1A adrenergic receptor            | DrugBank | 63  | neglect       |
| 145      |                                         |          | 66  | PDSP17676     |
| 3594299  | Alpha-2A adrenergic receptor            | DrugBank | 68  | neglect       |
| 3831004  | Dopamine uptake inhibitor               | ChEMBL   | 70  | neglect       |
| 1261     | Histamine H1 receptor                   | DrugBank | 71  | neglect       |
| 2019621  | Histamine H1 receptor                   | DrugBank | 74  | neglect       |
| 896849   | D(1A) dopamine receptor                 | DrugBank | 75  | neglect       |
| 12503073 | Alpha-2A adrenergic receptor            | DrugBank | 76  | neglect       |
| 19156872 | Histamine H1 receptor                   | DrugBank | 77  | neglect       |
| 3831110  | 5-hydroxytryptamine 7 receptor          | DrugBank | 78  | neglect       |
| 669      | D(1A) dopamine receptor                 | DrugBank | 79  | neglect       |
| 4351     | Histamine H1 receptor                   | DrugBank | 82  | neglect       |
| 1493878  | sorafenib                               |          | 85  | PDSP17674     |
| 20244    | Histamine H1 receptor                   | DrugBank | 87  | neglect       |
| 57524    | Histamine H1 receptor                   | DrugBank | 88  | neglect       |
| 122      | Muscarinic acetylcholine<br>receptor M1 | DrugBank | 91  | neglect       |
| 57253    | Histamine H1 receptor                   | DrugBank | 94  | neglect       |
| 155269   | Histamine H1 receptor                   | DrugBank | 95  | neglect       |
| 2019839  |                                         |          | 96  | not available |
| 2018341  |                                         |          | 99  | not available |
| 897251   | 5-hydroxytryptamine 2A receptor         | DrugBank | 100 | neglect       |
| 968306   | Alpha-2A adrenergic receptor            | DrugBank | 102 | neglect       |
| 56647    | Muscarinic acetylcholine<br>receptor M3 | DrugBank | 103 | neglect       |
| 2266     |                                         |          | 104 | PDSP17676     |
| 113410   | Histamine H1 receptor                   | DrugBank | 105 | neglect       |

|          |                                         |          |     |               |
|----------|-----------------------------------------|----------|-----|---------------|
| 113404   | Histamine H1 receptor                   | DrugBank | 107 | neglect       |
| 608117   |                                         |          | 108 | not available |
| 1087483  | opioid receptor                         | DrugBank | 111 | neglect       |
| 607      | Histamine H1 receptor                   | DrugBank | 112 | neglect       |
| 1530695  | 5-hydroxytryptamine 2A receptor         | DrugBank | 114 | neglect       |
| 843      |                                         |          | 115 | not available |
| 403011   | Alpha-1A adrenergic receptor            | DrugBank | 116 | neglect       |
| 104      | Beta-1 adrenergic receptor              | Chemble  | 117 | neglect       |
| 20250    | Muscarinic acetylcholine<br>receptor M3 | DrugBank | 119 | neglect       |
| 3799072  | Beta-2 adrenergic receptor              | DrugBank | 121 | neglect       |
| 9073     | D(1A) dopamine receptor                 | DrugBank | 130 | neglect       |
| 1482162  | Histamine H1 receptor                   | Chemble  | 132 | neglect       |
| 968257   | Alpha-2A adrenergic receptor            | DrugBank | 133 | neglect       |
| 57198    | Dopamine receptor                       | DrugBank | 135 | neglect       |
| 3830580  |                                         |          | 136 | PDSP17675     |
| 4097283  |                                         |          | 137 | not available |
| 1931     | Dopamine D1 receptor                    | Chemble  | 139 | neglect       |
| 1681     | Kappa-type opioid receptor              | DrugBank | 140 | neglect       |
| 10402    | D(1A) dopamine receptor                 | DrugBank | 141 | neglect       |
| 242      | Muscarinic acetylcholine<br>receptor M1 | DrugBank | 146 | neglect       |
| 608179   | Mu-type opioid receptor                 | DrugBank | 147 | neglect       |
| 968338   | Histamine H1 receptor                   | DrugBank | 148 | neglect       |
| 3830970  |                                         |          | 149 | not available |
| 19360739 | Histamine H1 receptor                   | DrugBank | 150 | neglect       |
| 1672     |                                         |          | 151 | not available |
| 1851149  | 5-hydroxytryptamine 2A receptor         | DrugBank | 152 | neglect       |

|          |                                        |          |     |               |
|----------|----------------------------------------|----------|-----|---------------|
| 19632891 | Histamine H1 receptor                  | DrugBank | 153 | neglect       |
| 2018342  |                                        |          | 154 | not available |
| 57206    | Dopamine transporter                   | Chemble  | 155 | neglect       |
| 3830995  |                                        |          | 156 | PDSP17675     |
| 538065   | 5-hydroxytryptamine 2A receptor        | DrugBank | 157 | neglect       |
| 637      | Beta-2 adrenergic receptor             | DrugBank | 160 | neglect       |
| 1481966  | 5-hydroxytryptamine 1A receptor        | DrugBank | 162 | neglect       |
| 4319     | Beta-1 adrenergic receptor             | DrugBank | 166 | neglect       |
| 508068   | Histamine H1 receptor                  | DrugBank | 168 | neglect       |
| 3831511  | Histamine H1 receptor                  | DrugBank | 169 | neglect       |
| 601270   | likely be 5-HT2A binder                |          | 171 | not available |
| 2032320  | Beta-2 adrenergic receptor             | Chemble  | 172 | neglect       |
| 1550499  | Extracellular calcium-sensing receptor | DrugBank | 173 | not available |
| 1530759  |                                        |          | 174 | not available |
| 3794601  | Serotonin transporter                  | DrugBank | 176 | neglect       |
| 3831236  | likely be Adrenoceptor binder          |          | 177 | not available |
| 968263   | 5-hydroxytryptamine 2A receptor        | DrugBank | 184 | neglect       |
| 597013   | 5-hydroxytryptamine 2A receptor        | DrugBank | 186 | neglect       |
| 57623    | Beta-1 adrenergic receptor             | DrugBank | 187 | neglect       |
| 597358   |                                        |          | 189 | PDSP17681     |
| 3830270  |                                        |          | 194 | not available |
| 565      | Histamine H1 receptor                  | DrugBank | 197 | neglect       |
| 56651    | Muscarinic acetylcholine receptor M1   | DrugBank | 198 | neglect       |
| 480      | Histamine H1 receptor                  | DrugBank | 200 | neglect       |

**Table S4.** Six FDA approved drugs selected for experimental binding assay.

| Drug Name      | Vendor ID     | PDSP ID | Chemical Structure                                                                  | Primary screening (10 uM) | Secondary screening (Ki) | Annotated Drug Target             | MM-GB/SA Ranking |
|----------------|---------------|---------|-------------------------------------------------------------------------------------|---------------------------|--------------------------|-----------------------------------|------------------|
| Clindamycin    | sigma C5269   | 17675   | 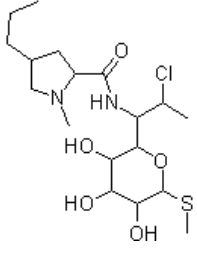   | 1.4%                      | N/A                      | 50s ribosomal subunit             | 18               |
| Sulfaguanidine | Sigma S8751   | 17678   |    | -6.1%                     | N/A                      | Dihydropterotate synthetase       | 22               |
| Bicalutamide   | Sigma B9061   | 17680   |   | 8.9%                      | N/A                      | Androgen receptor antagonist      | 52               |
| Cibenzoline    | Sigma C1618   | 17676   |  | 25.4%                     | N/A                      | ATP-sensitive K channel           | 66               |
| Sorafenib      | LC lab S-8502 | 17674   |  | 88.1%                     | 1949 nM                  | c-Kit<br>VEGFR2<br>PDGFRb<br>FLT3 | 85               |
| Vinpocetine    | Sigma V6383   | 17681   |  | 15%                       | N/A                      | PDE1 inhibitor                    | 189              |

**Detailed Experimental Assays.** The experimental binding assays were performed by the National Institute of Mental Health's Psychoactive Drug Screening Program (PDSP) following the standard protocol. Briefly, the radio-labeled reference compounds ( $[^3\text{H}]8\text{-OH-DPAT}$  for  $5\text{-HT}_{1\text{A}}$ ;  $[^3\text{H}]GR127543$  for  $5\text{-HT}_{1\text{B}}$  and  $5\text{-HT}_{1\text{D}}$ ;  $[^3\text{H}]5\text{-HT}$  for  $5\text{-HT}_{1\text{E}}$ ;  $[^3\text{H}]Ketanserin$  for  $5\text{-HT}_{2\text{A}}$ ;  $[^3\text{H}]LSD$  for  $5\text{-HT}_{2\text{B}}$  and  $5\text{-HT}_{2\text{C}}$ ,  $5\text{-HT}_{5\text{a}}$ ,  $5\text{-HT}_6$  and  $5\text{-HT}_7$ ;  $[^3\text{H}]LY278584$  for  $5\text{-HT}_3$ ) are diluted to 5X final assay concentration (50  $\mu\text{M}$  for a final assay concentration of 10  $\mu\text{M}$ ) in the standard binding buffer. Subsequently, 50  $\mu\text{l}$  aliquots of buffer (negative control), test compound, and reference compound are added in quadruplicate to the wells of a 96-well plate, each of which contains 50  $\mu\text{l}$  of 5X radioligand and 100  $\mu\text{l}$  of buffer. Finally, receptor-containing, crude membrane fractions are resuspended in an appropriate volume of buffer and dispensed (50  $\mu\text{l}$  per well) into the 96-well plate. Radioligand binding is allowed to equilibrate (typically for 1.5 hours at room temperature), and then bound radioactivity is isolated by filtration onto 0.3% polyethyleneimine-treated, 96-well filter mats using a 96-well Filtermate harvester. The filter mats are dried, then scintillant is melted onto the filters and the radioactivity retained on the filters is counted in a Microbeta scintillation counter. Raw dpm data from the Microbeta counter are analyzed on the PDSP DB. Total bound radioactivity is estimated from quadruplicate wells without containing test or reference compound and adjusted to 100%; non-specifically bound radioactivity is assessed from quadruplicate wells containing 10  $\mu\text{M}$  of a suitable reference compound and adjusted to 0%. The average bound radioactivity in the presence of the test compound (10  $\mu\text{M}$  final assay concentration, quadruplicate determinations) is expressed on the percent scale. The percent inhibition of radioligand binding is calculated as follows:  $\% \text{ inhibition} = 100\% - \% \text{ radioactivity-bound}$ . The PDSP on-line data entry and analysis system calculates the variance of the quadruplicate determinations (for the total, non-specific, and test compound binding values) and variances greater than 20% are flagged for further inspection and assays are repeated if necessary.

The stable cell line from GenScript Corporation, CHO-K1/5-HT<sub>2A</sub>, was applied for the cellular screening of the compound shown significant activities in 5-HT<sub>2A</sub> binding assay using FLIPR method.

Briefly, the compound plate for the first addition contains the compound at concentration 5X final assay concentrations in the reading plate. The agonist plate for the second addition contains the agonist at the concentration 5X final concentrations in the reading plate. The total reading time is 420 seconds. The first addition consists of test compound after 20 seconds reading of the baseline and the fluorescence signal is captured for another 290 seconds (20 s to 310 s). Subsequently, 75 nM (5x final concentration) of 5-HT is added to the cell plate and the fluorescence signal is monitored for an additional 110 s (310 s to 420 s). In compound screening, cells stimulated with assay buffer (HBSS-HEPES) containing 0.5% DMSO are chosen as the background, cells stimulated with 15 nM (EC<sub>80</sub> of the cell line) of 5-HT are chosen as the negative control, and cells treated with 10 μM of ketanserin tartrate are used as the positive control. Data acquisition and analyses are performed using ScreenWorks (version 3.1) program. The average value of 10 (300 s to 310 s) seconds reading is calculated as the baseline reading and the relative fluorescent units (ΔRFU) intensity values are calculated with the maximal fluorescent units (310 s to 420 s) subtracting the average value of baseline reading. The % inhibition of the test article is calculated from the following equation: %inhibition = {1 - (ΔRFU<sub>Compound</sub> - ΔRFU<sub>Background</sub>)/(ΔRFU<sub>Negative-control</sub> - ΔRFU<sub>Background</sub>)}



## Sorafenib analogues chemical synthesis route and analysis data

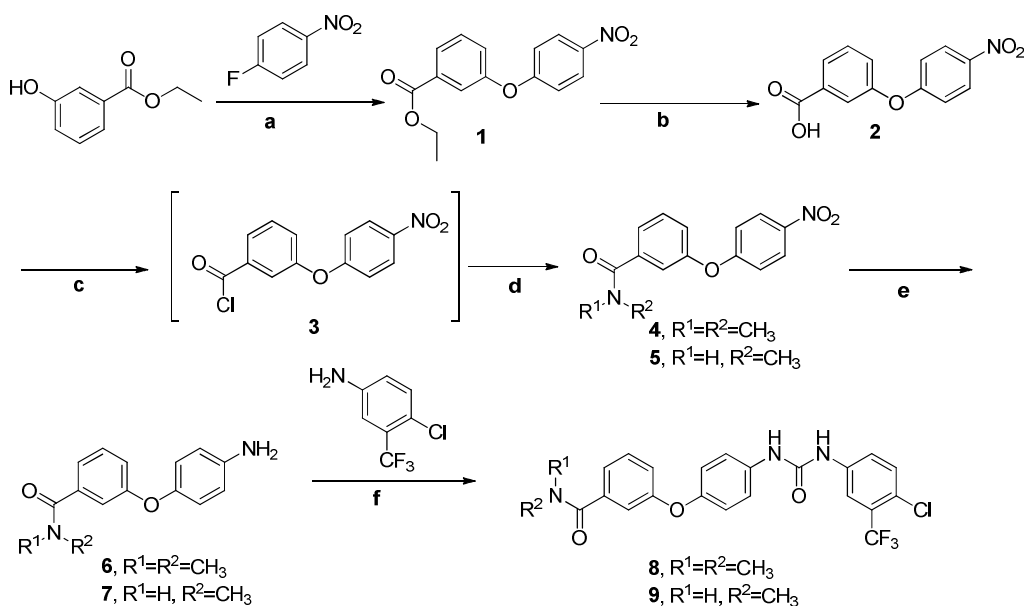

(a)  $K_2CO_3$ , DMF; (b) LiOH, THF,  $H_2O$ ; (c)  $SOCl_2$ , DCM; (d)  $R^1R^2NH$ , TEA, DCM; (e) Pd/C,  $H_2$ , MeOH; (f) Triphosgene, TEA, DCM.

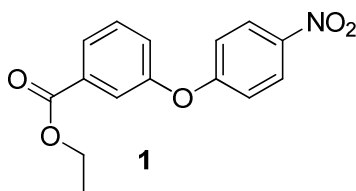

**Ethyl 3-(4-nitrophenoxy)benzoate (1)** To a stirred solution of 1-fluoro-4-nitrobenzene (4.23 g, 30 mmol), ethyl 3-hydroxybenzoate (4.98 g, 30 mmol) in DMF (40 mL) was added  $K_2CO_3$  (8.28 g, 60 mmol) at 25 °C. The reaction was heated at 135 °C for 4 hours. TLC indicated the reaction was completed. The reaction was cooled to rt, diluted with water (50 mL), and extracted with ethyl acetate ( $3 \times 50$  mL). The combined organic phase was washed with brine, dried over anhydrous sodium sulfate and concentrated under reduced pressure to obtain the crude title compound (8.2 g) as a yellow oil which was used directly in the next step. LCMS: (ESI)  $m/z$  288 ( $M+1$ )<sup>+</sup>.

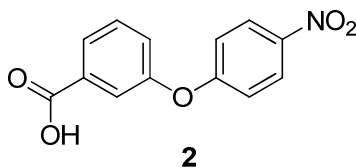

**3-(4-nitrophenoxy)benzoic acid (2)** To a solution of compound **1** (8.2 g, 28.5 mmol) in THF/water (75/75 mL) was added LiOH· $H_2O$  (2.34 g, 57 mmol) in some portions. The reaction was stirred at 50 °C for 4 hours. The reaction was cooled to rt, diluted with water (50 mL), and extracted with ethyl acetate (30 mL). The aqueous layer was collected and adjusted to pH 2 with 2N HCl solution. The resulting pale yellow solids were filtered and washed with PE (40 mL) to give the compound **2** (4.6 g, 62% for two

steps). <sup>1</sup>H-NMR (400 MHz, CDCl<sub>3</sub>) δ 8.25 - 8.22 (m, 2H), 7.99 (d, *J* = 8.0 Hz, 1H), 7.81 (s, 1H), 7.56 (t, *J* = 8.0 Hz, 1H), 7.38 – 7.35 (m, 1H), 7.07 – 7.04 (m, 2H) ppm.

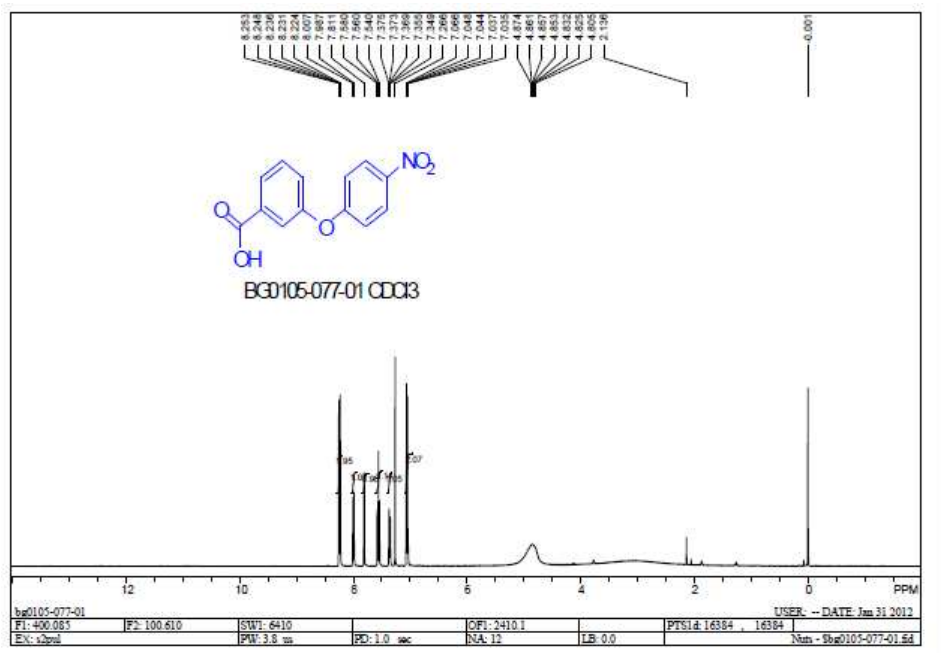

(1) Riedl, B.; Dumas, J.; Khire, U.; Lowinger, T. B.; Scott, W. J.; Smith, R. A.; Wood, J.E.; Monahan, M.-K.; Natero, R.; Renick, J.; Sibley, R. N. Omega-carboxyaryl substituted diphenyl ureas as raf kinase inhibitors. Patent Application, U.S., 7235576, (B1), 26 Jun 2007

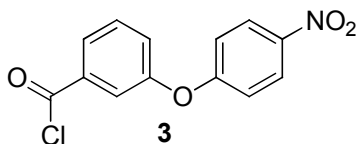

**3-(4-nitrophenoxy)benzoyl chloride (3)** To a solution of compound **2** (500 mg, 2 mmol) in DCM (5 mL) was added SOCl<sub>2</sub> (2 mL) and DMF (2 drops). The solution was stirred at 50 °C for 3 hours. TLC indicated the reaction was completed. The mixture was concentrated to dryness and used directly in the next step without purification.

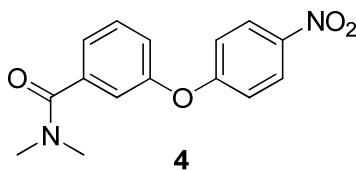

**N,N-dimethyl-3-(4-nitrophenoxy)benzamide (4)** To a solution of dimethylamine hydrochloride (163 mg, 2 mmol) and TEA (606 mg, 6 mmol) in DCM (3 mL) was added compound **3** in DCM (5 mL) at rt. The solution was stirred at rt for 2 hours. The solution was concentrated to dryness. The residue was dissolved in EtOAc (30 mL), washed with 1N HCl solution (15 mL) and brine, dried over anhydrous sodium sulfate and concentrated under reduced pressure to give the title compound (480 mg, yield 83%, two steps) as a colorless oil. LCMS: (ESI) *m/z* 287 (M+1)<sup>+</sup>.

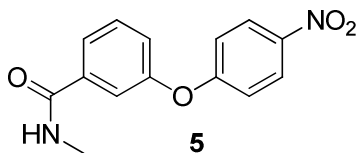

*N*-methyl-3-(4-nitrophenoxy)benzamide (**5**) Compound **5** was prepared from **3** as described in the preparation of **4**, providing **5** (460 mg, 84%) as a colorless oil. LCMS: (ESI)  $m/z$  273 (M+1)<sup>+</sup>.

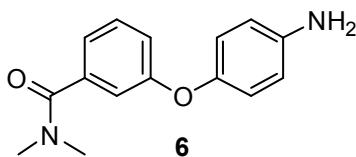

3-(4-aminophenoxy)-*N,N*-dimethylbenzamide (**6**) To a mixture of compound **4** (480 mg, 1.68 mmol) in CH<sub>3</sub>OH (5 mL) was added Pd/C (200 mg). Then the reaction was stirred at rt under H<sub>2</sub> (balloon) for 5 hours. The mixture was filtered through a pad of Celite and the filtrate was concentrated under reduced pressure. The residue was purified by prep-HPLC to give the title compound (365 mg, yield 85%) as a brown solid. LCMS: (ESI)  $m/z$  257 (M+1)<sup>+</sup>.

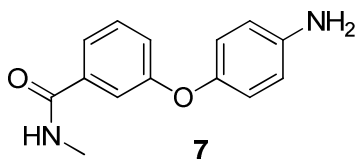

3-(4-aminophenoxy)-*N*-methylbenzamide (**7**) Compound **7** was prepared from **5** (460 mg, 1.69 mmol) as described in the preparation of **6**, providing **7** (320 mg, yield 78%) as a brown solid. LCMS: (ESI)  $m/z$  243 (M+1)<sup>+</sup>.

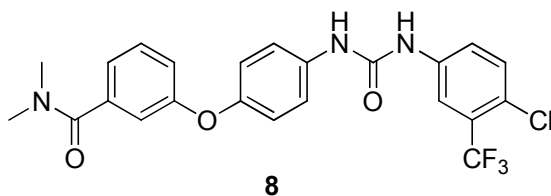

3-(4-(3-(4-chloro-3-(trifluoromethyl)phenyl)ureido)phenoxy)-*N,N*-dimethyl benzamide (**8**) To a mixture of bis(trichloromethyl) carbonate (87.4 mg, 0.3 mmol) in DCM (5 mL) at 0 °C was added dropwise a solution of 4-chloro-3-(trifluoromethyl) aniline (195 mg 1 mmol) and TEA ( 606 mg , 6 mmol). The solution was stirred at 0 °C for 1 hour. Compound **6** (128 mg, 0.5 mmol) was added and the reaction was stirred at rt for 4 hours. The mixture was concentrated to dryness and the residue was purified by column chromatography (DCM/MeOH=50/1) and further purified by prep-HPLC to give the title compound (8 mg, 4%) as a solid. <sup>1</sup>H-NMR (400 MHz, DMSO) δ 9.21 (s, 1H), 8.93 (s, 1H), 8.11 (d,  $J$  = 2.0 Hz, 1H), 7.64 – 7.62 (m, 2H), 7.52 – 7.49 (m, 2H), 7.42 (t,  $J$  = 8.0 Hz, 1H), 7.11 – 7.09 (m, 1H), 7.05 – 7.02 (m, 3H), 6.90 (s, 1H), 3.37 (s, 3H), 3.35 (s, 3H) ppm. LCMS: (ESI)  $m/z$  478(M+1)<sup>+</sup>.

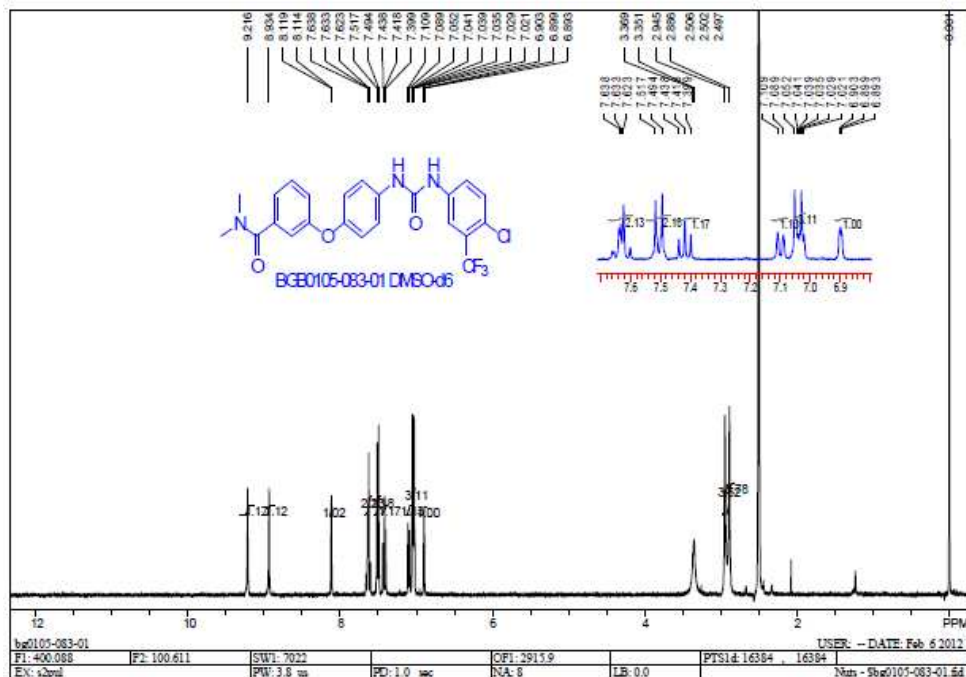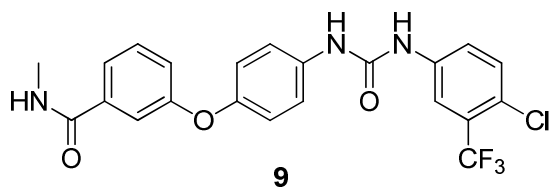

*3-(4-(3-(4-chloro-3-(trifluoromethyl)phenyl)ureido)phenoxy)-N-methylbenzamide (9)* Compound **9** was prepared from **7** (120 mg, 0.5 mmol) as described in the preparation of **8**, providing **9** (10 mg, 4%) as a solid.  $^1\text{H-NMR}$  (400 MHz, DMSO)  $\delta$  9.23 (s, 1H), 8.95 (s, 1H), 8.47 (d,  $J = 4.4$  Hz, 1H), 8.11 (d,  $J = 2.4$  Hz, 1H), 7.64 – 7.60 (m, 2H), 7.57 – 7.49 (m, 2H), 7.44 (t,  $J = 8.4$  Hz, 1H), 7.39 (s, 1H), 7.14 – 7.11 (m, 1H), 7.03 – 7.01 (m, 2H), 3.36 (s, 3H) ppm. LCMS: (ESI)  $m/z$  464(M+1) $^+$ .

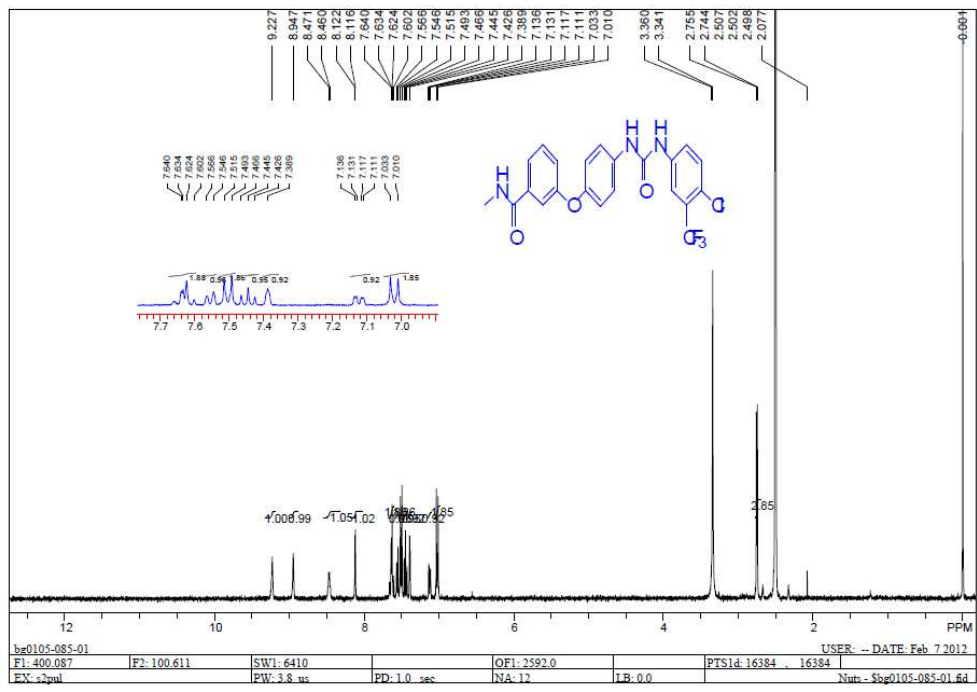

Supplement: NIHMS387490-supplement-1_si_001.pdf [file NIHMS387490-supplement-1_si_001.pdf]
